# Supplementary material for: Path of electron transfer created in S-doped NH2-UiO-66 bridged ZnIn2S4/MoS2 nanosheet heterostructure for boosting photocatalytic hydrogen evolution
Source: Royal Society of Chemistry journal article supplement (doi:10.1039/d0cy00127a), 2020-01-01
Supplement: d0cy00127a1.pdf [file d0cy00127a1.pdf]

## Supplementary Information

for

Path of electron transfer created by S-doped NH<sub>2</sub>-UiO-66 bridged  
ZnIn<sub>2</sub>S<sub>4</sub>/MoS<sub>2</sub> nanosheet heterostructure for boosting photocatalytic  
hydrogen evolution

Qi Ran<sup>a</sup>, Zebin Yu<sup>a,\*</sup>, Ronghua Jiang<sup>b</sup>, Lun Qian<sup>a</sup>, Yanping Hou<sup>a,c</sup>, Fei Yang<sup>d</sup>, Fengyuan  
Li<sup>a</sup>, Mingjie Li<sup>a</sup>, Qianqian Sun<sup>a</sup>, Heqing Zhang<sup>a</sup>

<sup>a</sup> School of Resources, Environment and Materials, Guangxi University, Nanning  
530004, PR China

<sup>b</sup> School of Chemical and Environmental Engineering, Shaoguan University, Shaoguan  
512005, P.R. China

<sup>c</sup> Guangxi Bossco Environmental Protection Technology Co., Ltd, 12 Kexin Road,  
Nanning 530007, China

<sup>d</sup> Guangzhou Institution Energy Testing, Guangzhou 510170, Guangzhou, P. R. China

\* Corresponding author: Tel.: + 8613877108420; E-mail: yuzebin@gxu.edu.cn (Z. Yu)

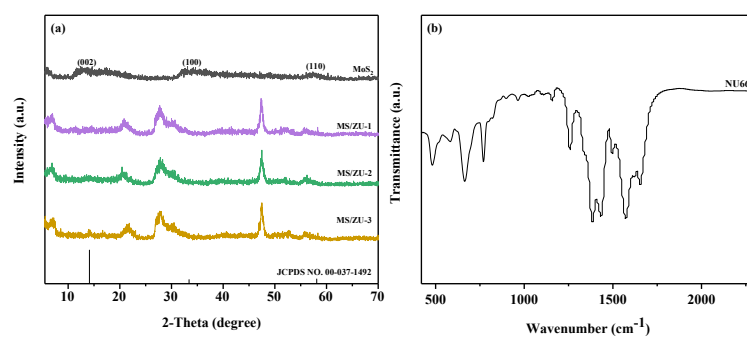

Fig. S1 (a) PXRD patterns of MoS<sub>2</sub> and MS/ZU samples, (b) FT-IR spectra of NU66 sample.

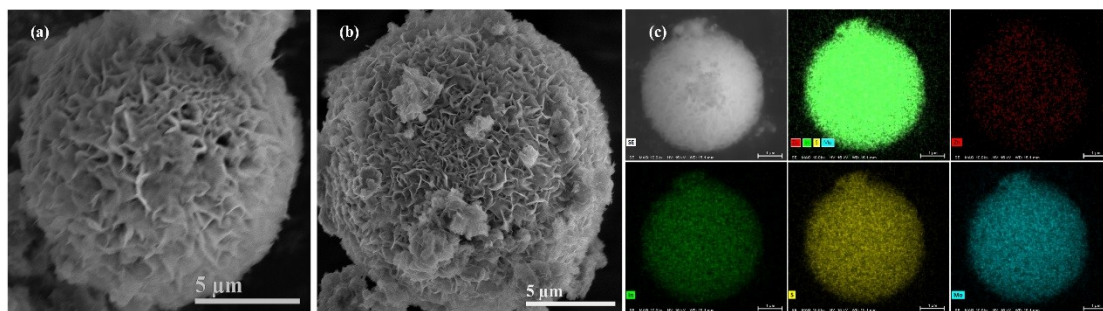

Fig. S2 FE-SEM images of (a) MS/ZU-1, (b) MS/ZU-3; (c) Elemental mapping images of MS/ZIS sample.

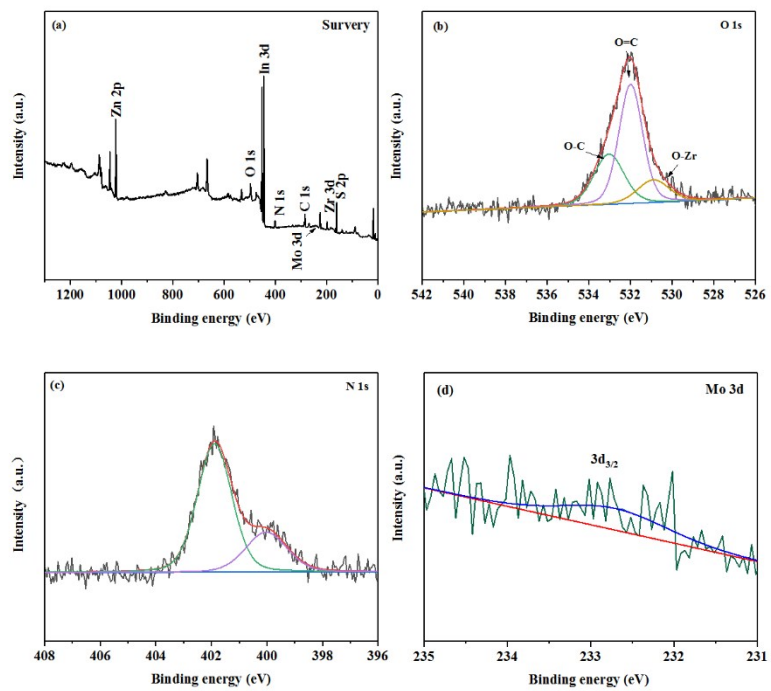

Fig. S3 XPS spectra of MS/ZU-2 (a) survey spectra, (b) O 1s, (c) N 1s, (d) Mo 3d spectra.

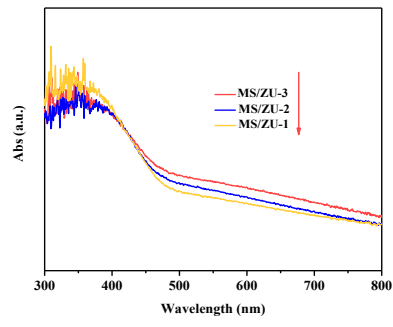

Fig.S4 UV-vis diffuse reflectance spectra of the synthesized MS/ZU samples.

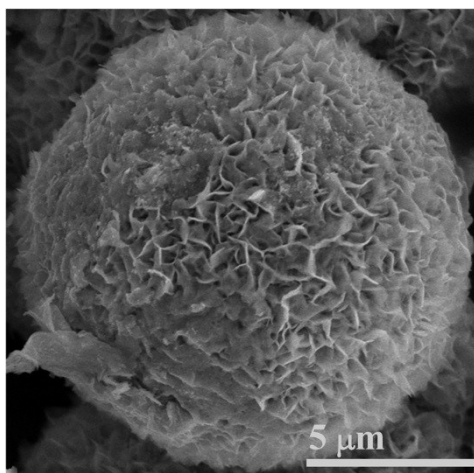

Fig. S5 The SEM image of used MS/ZU-2 sample.

Table S1 The BET surface area, pore volume and average pore size of ZIS, NU66 and MS/ZU-2.

| Samples | $S_{\text{BET}}(\text{m}^2 \text{g}^{-1})$ | Pore volume ( $\text{cm}^3 \text{g}^{-1}$ ) | Average pore size<br>(nm) |
|---------|--------------------------------------------|---------------------------------------------|---------------------------|
| NU66    | 653.5                                      | 0.231                                       | 2.665                     |
| ZIS     | 102.9                                      | 0.159                                       | 18.639                    |
| MS/ZU-2 | 131.1                                      | 0.226                                       | 18.569                    |

Table S2 the ZIS, MS/ZIS and MS/ZU-2 samples are fitted with  $R_s$ ,  $R_{ct}$  and constant phase elements (CPE).

| Sample  | $R_s$ ( $\Omega$ ) | $R_{ct}$ ( $\Omega$ ) | CPE (F, $10^{-4}$ ) |
|---------|--------------------|-----------------------|---------------------|
| ZIS     | 8.961              | 1220                  | 2.309               |
| MS/ZIS  | 10.82              | 580                   | 1.412               |
| MS/ZU-2 | 9.704              | 403.8                 | 2.245               |



Table S3 TRPL decay spectra of samples

| Samples                        | ZIS   | MS/ZIS | MS/ZU-2 |
|--------------------------------|-------|--------|---------|
| t1 (ns)                        | 124.7 | 124.6  | 124.5   |
| A1 (%)                         | 36.52 | 22.78  | 17.09   |
| t2 (ns)                        | 27.89 | 26.29  | 21.98   |
| A2 (%)                         | 63.48 | 77.22  | 82.91   |
| tA (ns)                        | 97.59 | 83.61  | 77.21   |
| $K_{ET} (10^6 \text{ s}^{-1})$ | —     | 1.7    | 2.7     |
| $\eta_{inj} (\%)$              | —     | 14.3   | 20.9    |

Table S4 Photocatalytic hydrogen evolution over the reported ZnIn<sub>2</sub>S<sub>4</sub> composites

| Photocatalysts                                                                       | Catalyst, Sacrificial agents                                                         | Hydrogen production rate                  | Light Source                                 | Reference |
|--------------------------------------------------------------------------------------|--------------------------------------------------------------------------------------|-------------------------------------------|----------------------------------------------|-----------|
| ZnIn <sub>2</sub> S <sub>4</sub> /<br>UiO-66-NH <sub>2</sub><br>/5%-MoS <sub>2</sub> | 40 mg, 10% TEOA<br><br>50 mg, 0.25 M                                                 | 5.69 mmol g <sup>-1</sup> h <sup>-1</sup> | λ > 420 nm                                   | Our work  |
| MoS <sub>2</sub> /ZnIn <sub>2</sub> S <sub>4</sub>                                   | Na <sub>2</sub> SO <sub>3</sub> and 0.35<br>M Na <sub>2</sub> S<br><br>50 mg, 0.25 M | 3.89 mmol g <sup>-1</sup> h <sup>-1</sup> | λ > 420 nm                                   | 1         |
| ZnIn <sub>2</sub> S <sub>4</sub> /<br>NH <sub>2</sub> -MIL-125                       | Na <sub>2</sub> SO <sub>3</sub> and 0.35<br>M Na <sub>2</sub> S                      | 2.21 mmol g <sup>-1</sup> h <sup>-1</sup> | λ > 420 nm                                   | 2         |
| ZnIn <sub>2</sub> S <sub>4</sub> /UiO-66-<br>NH <sub>2</sub>                         | 20 mg, 0.25 M<br>Na <sub>2</sub> SO <sub>3</sub> and 0.35<br>M Na <sub>2</sub> S     | 2.19 mmol g <sup>-1</sup> h <sup>-1</sup> | λ > 420 nm                                   | 3         |
| g-C <sub>3</sub> N <sub>4</sub><br>@ZnIn <sub>2</sub> S <sub>4</sub>                 | 50 mg, 50 ml<br>water with 10 ml<br>TEOA<br><br>100 mg, 0.25 M                       | 2.78 mmol g <sup>-1</sup> h <sup>-1</sup> | λ > 420 nm                                   | 4         |
| TiO <sub>2</sub> /ZnIn <sub>2</sub> S <sub>4</sub>                                   | Na <sub>2</sub> SO <sub>3</sub> and 0.35<br>M Na <sub>2</sub> S                      | 0.35 mmol g <sup>-1</sup> h <sup>-1</sup> | 300 W Xe-<br>lamp with a cutoff<br>filter    | 5         |
| MoS <sub>2</sub> /ZnIn <sub>2</sub> S <sub>4</sub>                                   | 36 ml water with 4<br>ml lactic acid<br><br>1.5 mg, 5 mL                             | 4.97 mmol g <sup>-1</sup> h <sup>-1</sup> | 300 W Xe lamp<br>with a UV cutoff<br>filter. | 6         |
| NiS/ ZnIn <sub>2</sub> S <sub>4</sub>                                                | water with 50%<br>lactic acid                                                        | 5 μmol·h <sup>-1</sup>                    | λ = 420 nm                                   | 7         |

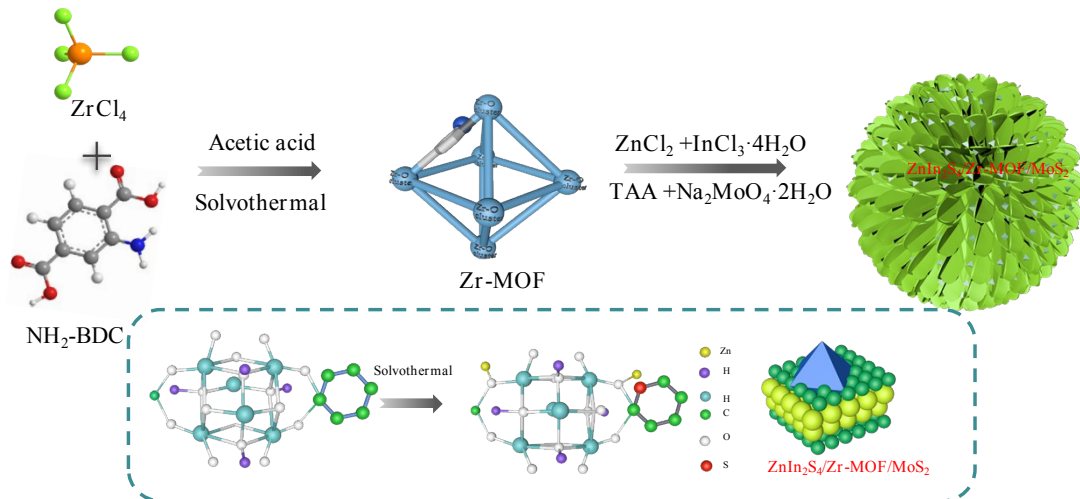

Scheme. 1 Schematic representation of the formation process of  $\text{ZnIn}_2\text{S}_4/\text{NH}_2\text{-UiO-66}/\text{MoS}_2$  sample.

## References

1. Z. Zhang, L. Huang, J. Zhang, F. Wang, Y. Xie, X. Shang, Y. Gu, H. Zhao and X. Wang, *Applied Catalysis B: Environmental*, 2018, **233**, 112-119.
2. H. Liu, J. Zhang and D. Ao, *Applied Catalysis B: Environmental*, 2018, **221**, 433-442.
3. C. Zhao, Y. Zhang, H. Jiang, J. Chen, Y. Liu, Q. Liang, M. Zhou, Z. Li and Y. Zhou, *The Journal of Physical Chemistry C*, 2019.
4. B. Lin, H. Li, H. An, W. Hao, J. Wei, Y. Dai, C. Ma and G. Yang, *Applied Catalysis B: Environmental*, 2018, **220**, 542-552.
5. N. Wei, Y. Wu, M. Wang, W. Sun, Z. Li, L. Ding and H. Cui, *Nanotechnology*, 2018, **30**, 045701.
6. L. Huang, B. Han, X. Huang, S. Liang, Z. Deng, W. Chen, M. Peng and H. Deng, *Journal of Alloys and Compounds*, 2019, **798**, 553-559.
7. A. Yan, X. Shi, F. Huang, M. Fujitsuka and T. Majima, *Applied Catalysis B: Environmental*, 2019, **250**, 163-170.
